# Supplementary material for: Hemicelluloses negatively affect lignocellulose crystallinity for high biomass digestibility under NaOH and H2SO4 pretreatments in Miscanthus
Source: PubMed Central journal article supplement (PMC3462114; doi:10.1186/1754-6834-5-58), 2012-08-11
Supplement: 1754-6834-5-58-S1.pdf [file 1754-6834-5-58-S1.pdf]

Hemicelluloses negatively affect lignocellulose crystallinity for high biomass  
digestibility under NaOH and H<sub>2</sub>SO<sub>4</sub> pretreatments in *Miscanthus*

Supplementary

**Table S1.** Hexoses yield (% cellulose) released from enzymatic hydrolysis after pretreatment

| Pair | Sample    | NaOH     |       |          |     |          |     | H <sub>2</sub> SO <sub>4</sub> |     |          |     |          |     |
|------|-----------|----------|-------|----------|-----|----------|-----|--------------------------------|-----|----------|-----|----------|-----|
|      |           | 0.5%     |       | 1%       |     | 4%       |     | 0.25%                          |     | 1%       |     | 4%       |     |
| I    | Mlu26 (H) | 54.9±0.9 | 1.6 * | 72.8±0.4 | 1.6 | 98.8±1.7 | 1.3 | 29.2±0.2                       | 1.5 | 40.8±1   | 1.5 | 47.0±1.0 | 1.4 |
|      | Msi34 (L) | 34.7±0.6 |       | 44.4±0.6 |     | 75.6±0.9 |     | 18.9±0.7                       |     | 26.5±0.7 |     | 34.2±0.9 |     |
| II   | Mfi03 (H) | 37.1±1.3 | 1.4   | 48.6±0.8 | 1.4 | 80.6±0.6 | 1.3 | 22.9±0.6                       | 2   | 37.9±0.4 | 2.1 | 41.9±0.6 | 1.7 |
|      | Mlu01(L)  | 26.3±1.5 |       | 34.8±0.2 |     | 60.5±1.6 |     | 11.2±0.7                       |     | 18.2±0.8 |     | 22.5±0.8 |     |
| III  | Mfi40 (H) | 33±0.5   | 1.9   | 54.4±1.4 | 1.5 | 74.6±7.7 | 1.3 | 16.2±1.8                       | 1.4 | 32.4±0.4 | 2.6 | 40.8±0.4 | 1.8 |
|      | Msa02 (L) | 17.4±1.7 |       | 36.5±1.5 |     | 58.5±5.7 |     | 11.9±0.4                       |     | 12.7±0.4 |     | 22.6±0.2 |     |
| IV   | Msi56 (H) | 48.8±3.1 | 1.4   | 57.9±0.7 | 1.1 | 84.1±6   | 1.1 | 27.6±1.1                       | 1.5 | 43.1±0.9 | 1.5 | 51.9±0.3 | 1.4 |
|      | Mfi04 (L) | 33.8±2.4 |       | 50.8±0.8 |     | 77.1±1.1 |     | 18.2±0.9                       |     | 29.1±1.5 |     | 38.4±0.6 |     |
| V    | Msa20 (H) | 47.3±2.9 | 2.0   | 64±1.2   | 1.8 | 90.9±1.4 | 1.2 | 27.2±1.2                       | 2.7 | 35.1±1.4 | 1.2 | 51.0±0.5 | 1.6 |
|      | Mfi08 (L) | 24.2±2.1 |       | 35.3±0.4 |     | 76.3±1.5 |     | 10.3±0.5                       |     | 28.4±0.9 |     | 31.9±1.9 |     |
| VI   | Mfi27 (H) | 46.3±1.5 | 2.1   | 65.6±3.4 | 2.2 | 96.6±3.4 | 1.8 | 20.8±1.0                       | 1.8 | 42.1±0.9 | 2.0 | 49.2±1.2 | 2.1 |
|      | Mlu12 (L) | 21.8±0.8 |       | 30.1±1.5 |     | 54.0±1.3 |     | 11.3±0.4                       |     | 21.2±0.8 |     | 23.7±0.6 |     |

\* Ratio of two sample values at pair

**Table S2.** Total sugar yield (% dry matter) released from both enzymatic hydrolysis and pretreatment

| Pair | Sample    | NaOH     |      |          |     |          |     | H <sub>2</sub> SO <sub>4</sub> |     |          |     |          |     |
|------|-----------|----------|------|----------|-----|----------|-----|--------------------------------|-----|----------|-----|----------|-----|
|      |           | 0.5%     |      | 1%       |     | 4%       |     | 0.25%                          |     | 1%       |     | 4%       |     |
| I    | Mlu26 (H) | 30.9±0.2 | 1.8* | 43.7±0.4 | 1.7 | 59.0±0.9 | 1.3 | 29.3±0.4                       | 1.3 | 40.2±0.4 | 1.4 | 44.1±0.7 | 1.1 |
|      | Msi34 (L) | 17.1±0.5 |      | 26.5±0.6 |     | 46.6±0.6 |     | 23.3±0.1                       |     | 29.7±0.4 |     | 38.7±0.6 |     |
| II   | Mfl03 (H) | 19.3±1.4 | 1.2  | 28.6±0.9 | 1.2 | 49.9±0.1 | 1.2 | 26.9±0.2                       | 1.4 | 37.5±1.2 | 1.4 | 40.1±0.4 | 1.2 |
|      | Mlu01 (L) | 16.6±0.1 |      | 23.9±0.2 |     | 42.3±0.8 |     | 18.6±0.3                       |     | 27.0±0.3 |     | 34.8±0   |     |
| III  | Mfl40 (H) | 21.8±0.3 | 2    | 38.1±0.2 | 1.6 | 50.6±2.4 | 1.3 | 26.9±0.8                       | 1.5 | 36.6±0.4 | 1.5 | 39.3±0.8 | 1.2 |
|      | Msa02 (L) | 11.1±1   |      | 24±0.7   |     | 39.2±2.2 |     | 17.4±0.1                       |     | 24.7±0.3 |     | 33.9±1.3 |     |
| IV   | Msi56 (H) | 36.0±2.5 | 2.3  | 47.5±0.5 | 1.8 | 63.7±2.5 | 1.4 | 33.5±0.8                       | 1.5 | 46.1±0.7 | 1.4 | 52.7±0.7 | 1.3 |
|      | Mfl04 (L) | 15.5±0.6 |      | 26.8±0.2 |     | 45.1±0.9 |     | 22±0.2                         |     | 32.5±0.9 |     | 39.2±0.4 |     |
| V    | Msa20 (H) | 24.4±1.1 | 1.4  | 37.7±0.9 | 1.3 | 52.8±0.5 | 1.1 | 28.2±0.5                       | 1.2 | 37.3±0.4 | 1.3 | 44.2±1.6 | 1.2 |
|      | Mfl08 (L) | 17.5±0.5 |      | 28.5±0.5 |     | 49.9±0.3 |     | 23±0.8                         |     | 28.1±0.6 |     | 38.4±1.3 |     |
| VI   | Mfl27 (H) | 23.9±1.0 | 1.5  | 36.5±1.1 | 1.4 | 54.4±1.0 | 1.2 | 31.6±0.4                       | 1.5 | 42.3±1.3 | 1.5 | 45.2±0.6 | 1.1 |
|      | Mlu12 (L) | 16.5±0.5 |      | 26.3±1.1 |     | 44.0±0.7 |     | 21.0±0.1                       |     | 29.2±0.6 |     | 39.6±0.4 |     |

\* Ratio of two sample values at pair

**Table S3.** Monosaccharide composition of hemicelluloses (% of total)

| Pair | Sample    | Rha     | Fuc | Ara    | Xyl    | Man   | Glu   | Gal   |
|------|-----------|---------|-----|--------|--------|-------|-------|-------|
| IV   | Msi56 (H) | 0.29% * | ND  | 13.08% | 83.45% | 0.20% | 1.10% | 1.86% |
|      | Mfl04 (L) | 0.28%   | ND  | 12.06% | 82.34% | 0.13% | 3.83% | 1.36% |

\* Percentage of total monosaccharides; ND, non-detectable.

**Table S4.** Monosaccharide composition of hemicelluloses (% of total)

| Pair     | Sample    | Rha     | Fuc | Ara    | Xyl    | Man   | Glu   | Gal   |
|----------|-----------|---------|-----|--------|--------|-------|-------|-------|
| <b>V</b> | Msa20 (H) | 0.24% * | ND  | 12.06% | 83.68% | 0.59% | 1.69% | 1.74% |
|          | Mfi08 (L) | 0.19%   | ND  | 10.88% | 85.17% | 0.14% | 2.66% | 0.95% |

\* Percentage of total monosaccharides; ND, non-detectable.

**Table S5.** Monosaccharide composition of hemicelluloses (% of total)

| Pair      | Sample    | Rha     | Fuc   | Ara    | Xyl    | Man   | Glu   | Gal   |
|-----------|-----------|---------|-------|--------|--------|-------|-------|-------|
| <b>VI</b> | Mfl27 (H) | 0.26% * | ND    | 12.68% | 80.53% | 0.14% | 4.95% | 1.43% |
|           | Mlu12 (L) | 0.17%   | 0.01% | 9.88%  | 87.45% | 0.20% | 0.99% | 1.31% |

\* Percentage of total monosaccharides; ND, non-detectable.

**Table S6.** Monomer composition of lignin (% of total)

| Pair | Sample    | H       | G      | S      | S/G  | H/G  | S/H  |
|------|-----------|---------|--------|--------|------|------|------|
| VI   | Mfi27 (H) | 27.79%* | 49.02% | 23.19% | 0.47 | 0.57 | 0.83 |
|      | Mlu12 (L) | 21.41%  | 45.11% | 33.48% | 0.74 | 0.47 | 1.56 |

\* Percentage of total monomers

**Table S7.** Linked Phenols of Mfl27 and Mlu12 ( $\mu\text{mol/g}$  dry matter)

| Linkage | Sample    | H-               | G-                | S-                | AV-            | AS-               | PCA-            | FA-               | Total |
|---------|-----------|------------------|-------------------|-------------------|----------------|-------------------|-----------------|-------------------|-------|
| Ester-  | Mfl27 (H) | 0.13<br>(2.59%)* | 0.26<br>(5.12%)   | 0.09<br>(1.76%)   | ND             | ND<br>(0%)        | 1<br>(19.31%)   | 3.69<br>(71.22%)  | 5.17  |
|         | Mlu12 (L) | 0.5<br>(6.77%)   | 0.99<br>(13.34%)  | 0.42<br>(5.63%)   | ND             | 0.03<br>(0.36%)   | 1.48<br>(20.1%) | 3.97<br>(53.81%)  | 7.38  |
| Ether-  | Mfl27 (H) | 2.86<br>(3.75%)  | 11.29<br>(14.78%) | 9.21<br>(12.05%)  | 6<br>(0.78%)   | 13.77<br>(18.02%) | 7.56<br>(9.89%) | 25.73<br>(33.67%) | 76.41 |
|         | Mlu12 (L) | 3.35<br>(3.48%)  | 19.46<br>(20.16%) | 29.75<br>(30.83%) | 6.0<br>(0.63%) | 12.59<br>(13.05%) | 5.91<br>(6.13%) | 19.39<br>(20.1%)  | 96.49 |

H-: *p*-Hydroxybenzaldehyde, G-: Vanillin, S-: Syringaldehyde, AV-: Acetovanillone, AS-: Acetosyringone, PCA-: *p*-Coumaric acid, FA-: Ferulic acid, SA-: Sinapic acid;

\* percentage of total linked-phenols.



**Table S8.** Correlation coefficient between cellulose CrI and total sugar yield released from both enzymatic hydrolysis and pretreatment

|                         | NaOH    |         |         | H <sub>2</sub> SO <sub>4</sub> |         |         |
|-------------------------|---------|---------|---------|--------------------------------|---------|---------|
|                         | 0.50%   | 1%      | 4%      | 0.25%                          | 1%      | 4%      |
| <b>Raw material CrI</b> | -.750** | -.748** | -.838** | -.875**                        | -.839** | -.812** |

\*\* significant differences at  $p < 0.01$ .

**Table S9.** Correlation coefficient between cellulose CrI and hexoses yield released from enzymatic hydrolysis after pretreatment.

|                         | NaOH     |         |          | H <sub>2</sub> SO <sub>4</sub> |          |          |
|-------------------------|----------|---------|----------|--------------------------------|----------|----------|
|                         | 0.50%    | 1%      | 4%       | 0.25%                          | 1%       | 4%       |
| <b>Raw material CrI</b> | -0.735** | -0.685* | -0.763** | -0.580*                        | -0.891** | -0.777** |

\* and \*\* significant differences at  $p < 0.05$  &  $0.01$ , respectively.
